# Supplementary material for: The electrochemical behaviors of tetrahydropalmatine at a nickel nanoparticles/sulfonated graphene sheets modified glassy carbon electrode
Source: Royal Society of Chemistry journal article supplement (doi:10.1039/c6ra10667f), 2016-01-01
Supplement: c6ra10667f1.pdf [file c6ra10667f1.pdf]

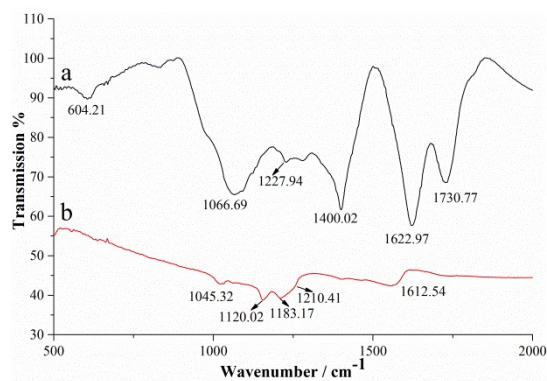

**Fig.S1.** FT-IR spectrum of GO (a) and SGS(b) at 532nm.

Fig. S1 presents the FT-IR spectrum of GO (Fig. S1a) and SGS ( Fig. S1b), through the figures above we could find some characteristic peaks. Which presented the successful reduction of GO to SGS nanomaterials

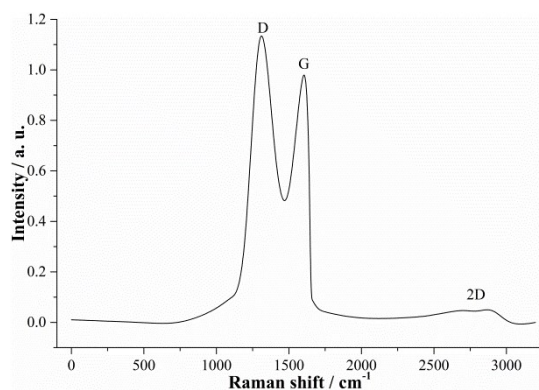

**Fig.S2.** Raman spectrum of GO recorded at 532 nm wavelength.

Fig. S2 showed us that the Raman spectra of GO sample is characterized by a D-band at 1300 cm<sup>-1</sup> and a G-band at 1650 cm<sup>-1</sup>, which showed that the successful synthesis of GO.

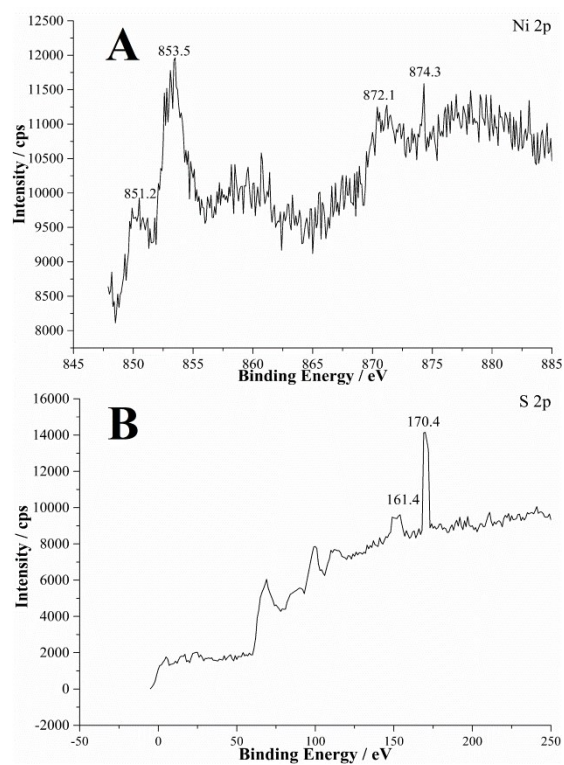

**Fig.S3.** (A) X-ray photoelectron spectrum of NiNPs; (B) X-ray photoelectron spectrum of Sulfur.

Fig. S3 is the larger version of Fig. 1D. We could find the peaks of Ni(II)  $2p_{3/2}$  and Ni(II)  $2p_{1/2}$  and S(VI)  $2p_{3/2}$  and S(VI)  $2p_{1/2}$ , showed the state of nickel and sulfur.

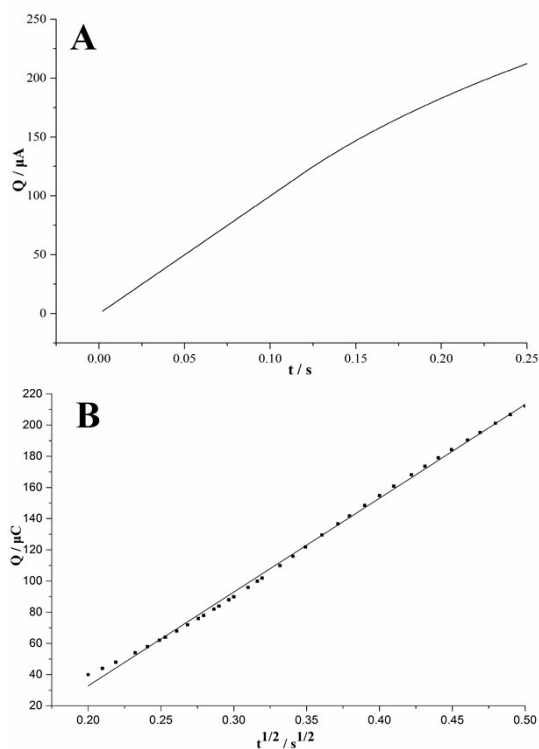

**Fig.S4.** (A)Chronocoulometric study of 10.0 $\mu\text{M}$  THP at NiNPs/SGS/GCE in PBS (pH=6.0); (B) Relationship between charges and the square root of times.

According to Fig. S4, we could find  $Q$  is approximately linearly related with  $t^{1/2}$ , and we can calculate the diffusion coefficient of THP in our selected conditions.

#### Figure captions:

**Fig.S1.** FT-IR spectrum of GO (a) and SGS(b) at 532nm.

**Fig.S2.** Raman spectrum of GO recorded at 532 nm wavelength.

**Fig.S3.** (A) X-ray photoelectron spectrum of NiNPs; (B) X-ray photoelectron spectrum of Sulfur.

**Fig.S4.** (A)Chronocoulometric study of 10.0 $\mu\text{M}$  THP at NiNPs/SGS/GCE in PBS (pH=6.0); (B) Relationship between charges and the square root of times.
